# Supplementary material for: The ARRE RING-Type E3 Ubiquitin Ligase Negatively Regulates Cuticular Wax Biosynthesis in Arabidopsis thaliana by Controlling ECERIFERUM1 and ECERIFERUM3 Protein Levels
Source: Frontiers journal article supplement (doi:10.3389/fpls.2021.752309), 2021-10-26
Supplement: Data_Sheet_1.PDF [file Data_Sheet_1.PDF]

## Supplementary Material

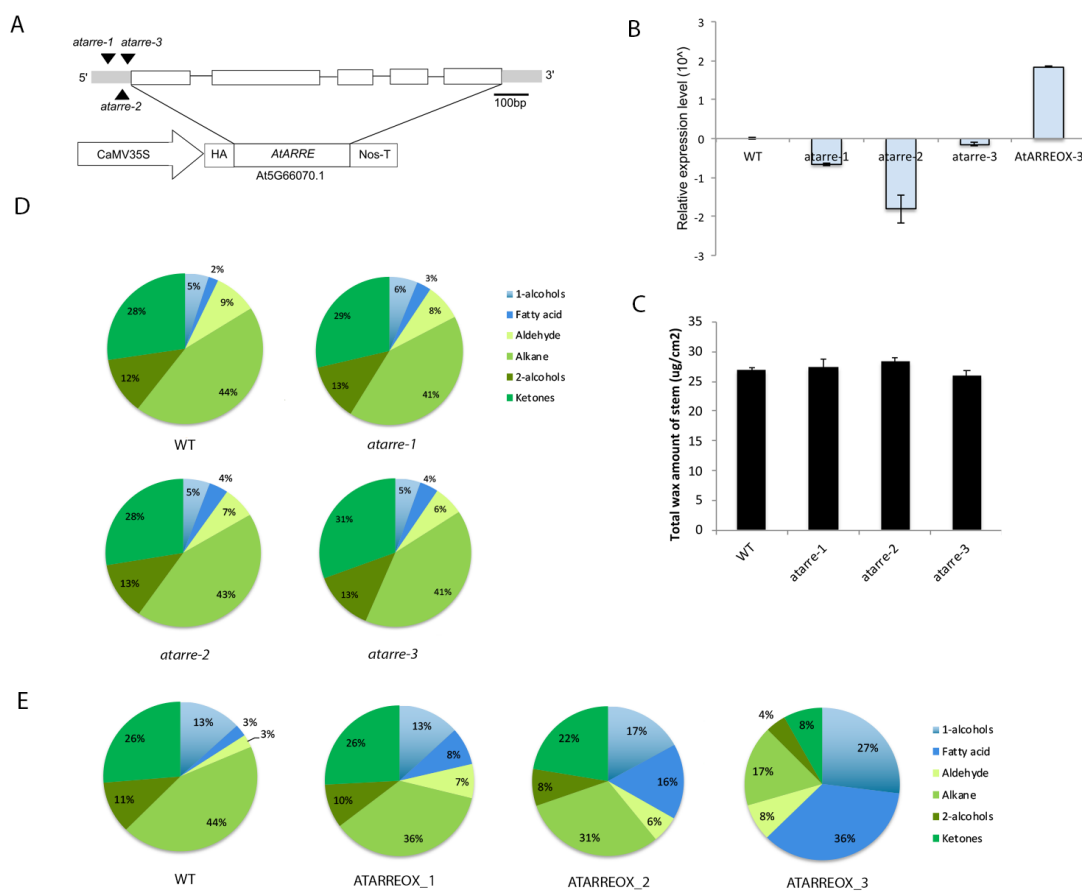

**Supplementary Figure 1.** Analysis of AtARREOX lines and *atarre* mutants.

**(A)** Schematic diagram of T-DNA insertion locations in *atarre* mutants and the original construct for generating AtARREOX lines. **(B)** *AtARRE* gene expression level in stems of the WT, *atarre* mutants, and a representative AtARREOX line, determined by qPCR. *ACTIN* was used as an internal control. The y-axis is shown in the logarithmic scale. Student's *t*-test was applied to identify statistically significant differences ( $p < 0.05$ ). Error bars represent means  $\pm$  SD (n=3). **(C)** Stem wax loads of *atarre* T-DNA mutants compared to the WT. **(D,E)** Stem wax composition of *atarre* mutant alleles (D) and AtARREOX lines (E) compared to the WT. Alkane pathway-derived compounds were labelled in shades of green color. Primary alcohol and fatty acids are labelled in shades of blue color.

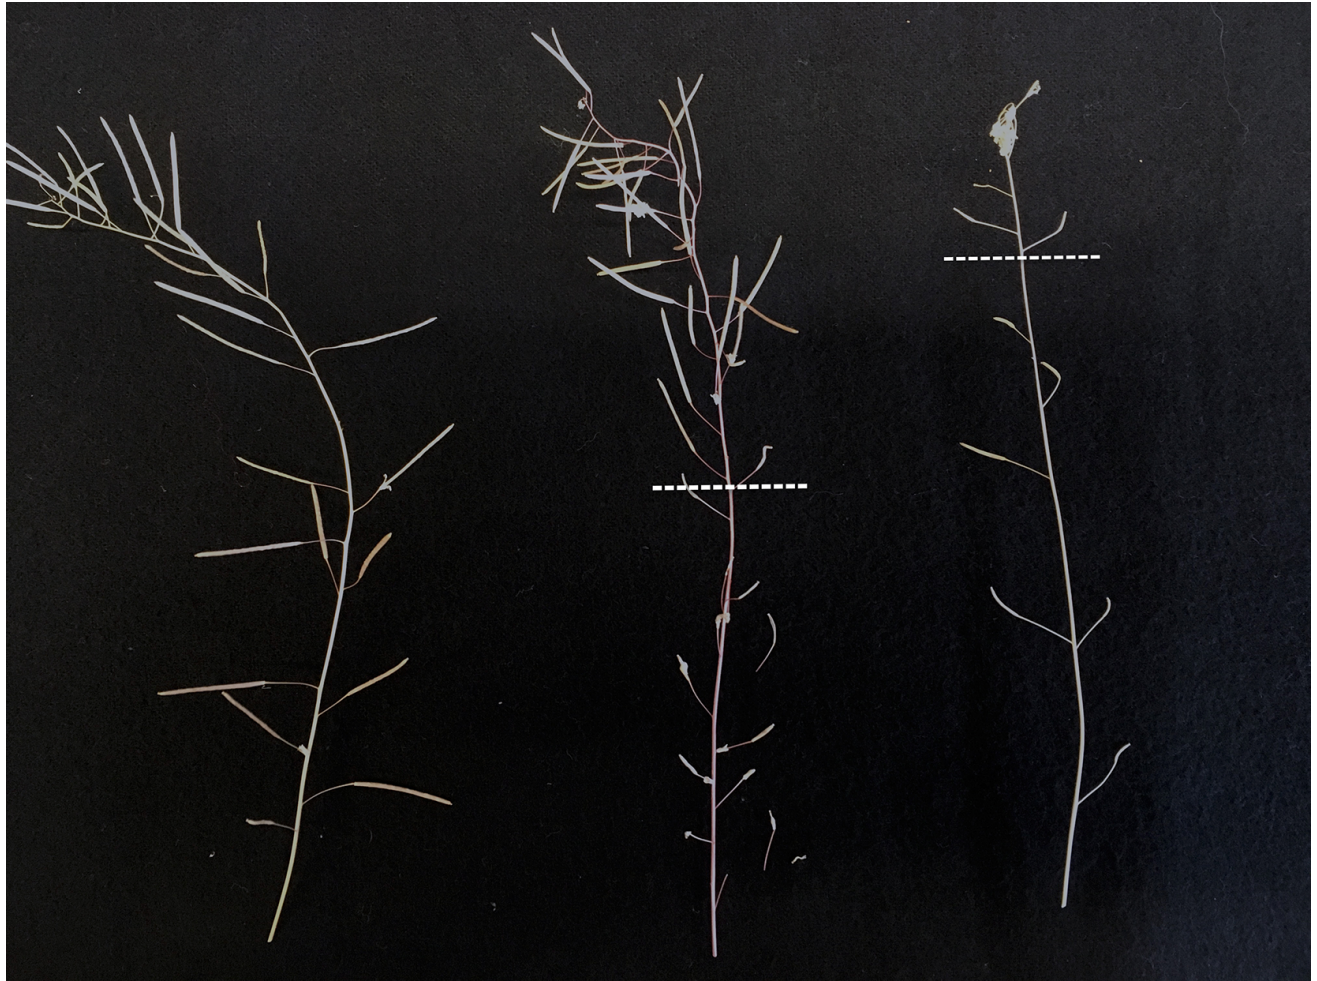

**Supplementary Figure 2.** Fertility of AtARREOX lines can be restored by high humidity.

Dry stems of WT Col-0 (left), AtARREOX\_2 (middle), and AtARREOX\_3 (right). WT was grown under normal humidity conditions; AtARREOX lines were grown under normal (below dashed line) and high-humidity conditions (above dashed line). High-humidity conditions were created by covering the plant with a plastic bag. AtARREOX\_3 line showed a severe organ fusion phenotype and fertility could not be fully recovered by growth in high humidity.

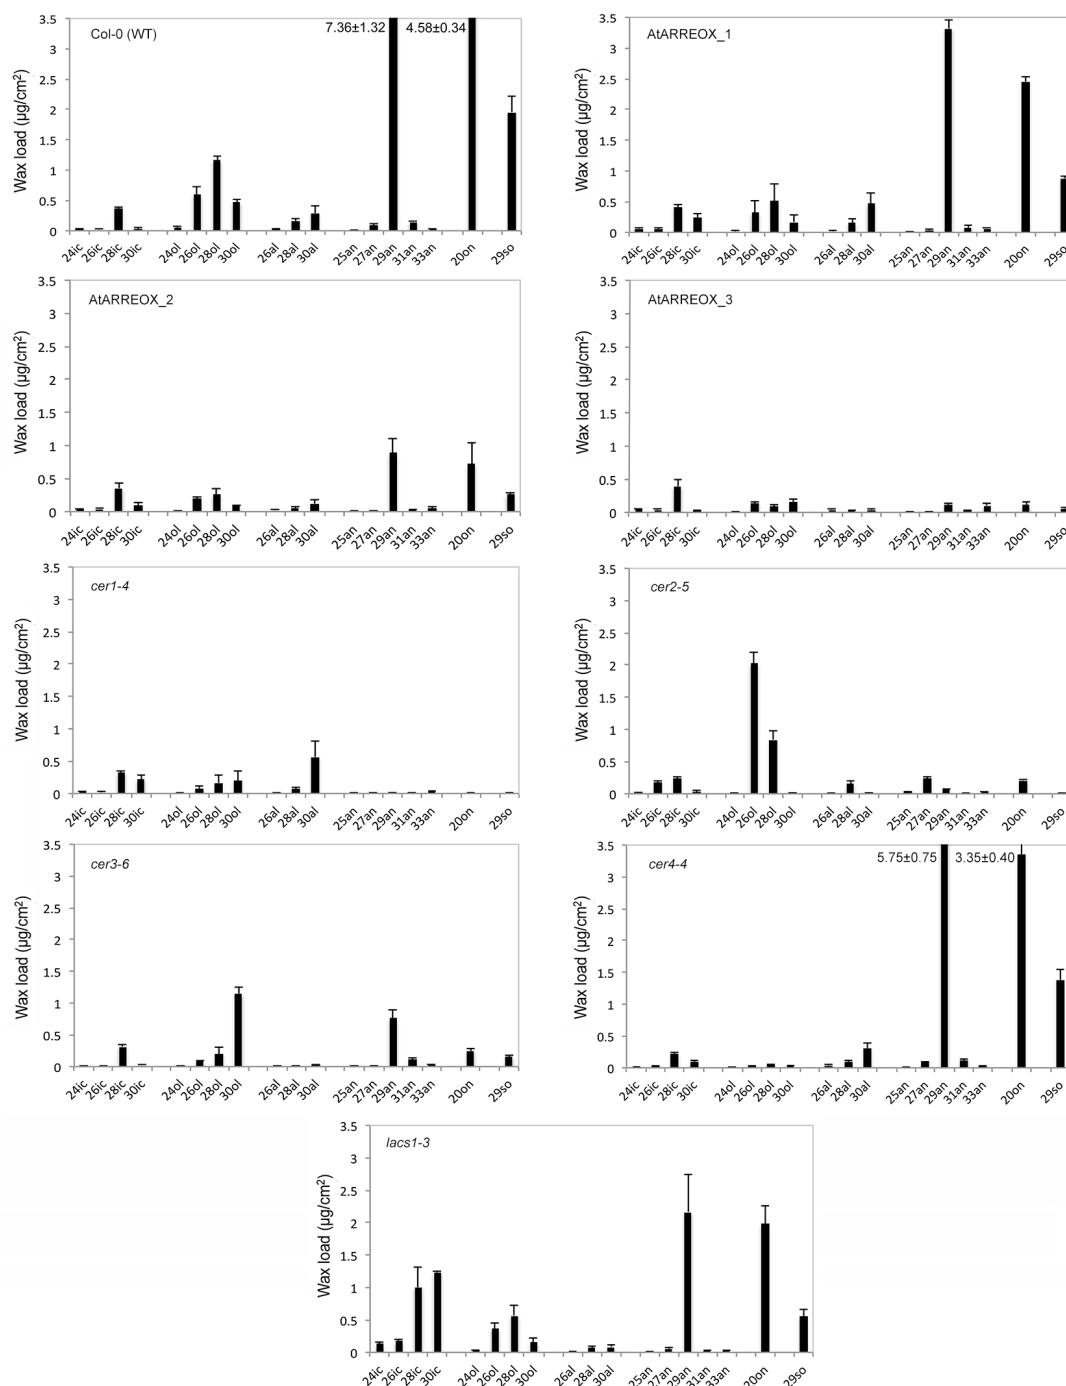

**Supplementary Figure 3.** Stem wax load and composition of WT Col-0, AtARREOX lines, *cer1-4*, *cer2-5*, *cer3-6*, *cer4-4*, and *lacs1-3* mutants.

Total stem wax load of 6-week-old plants were determined by GC-FID. Values are means of four biological replicates and error bars represent SD.

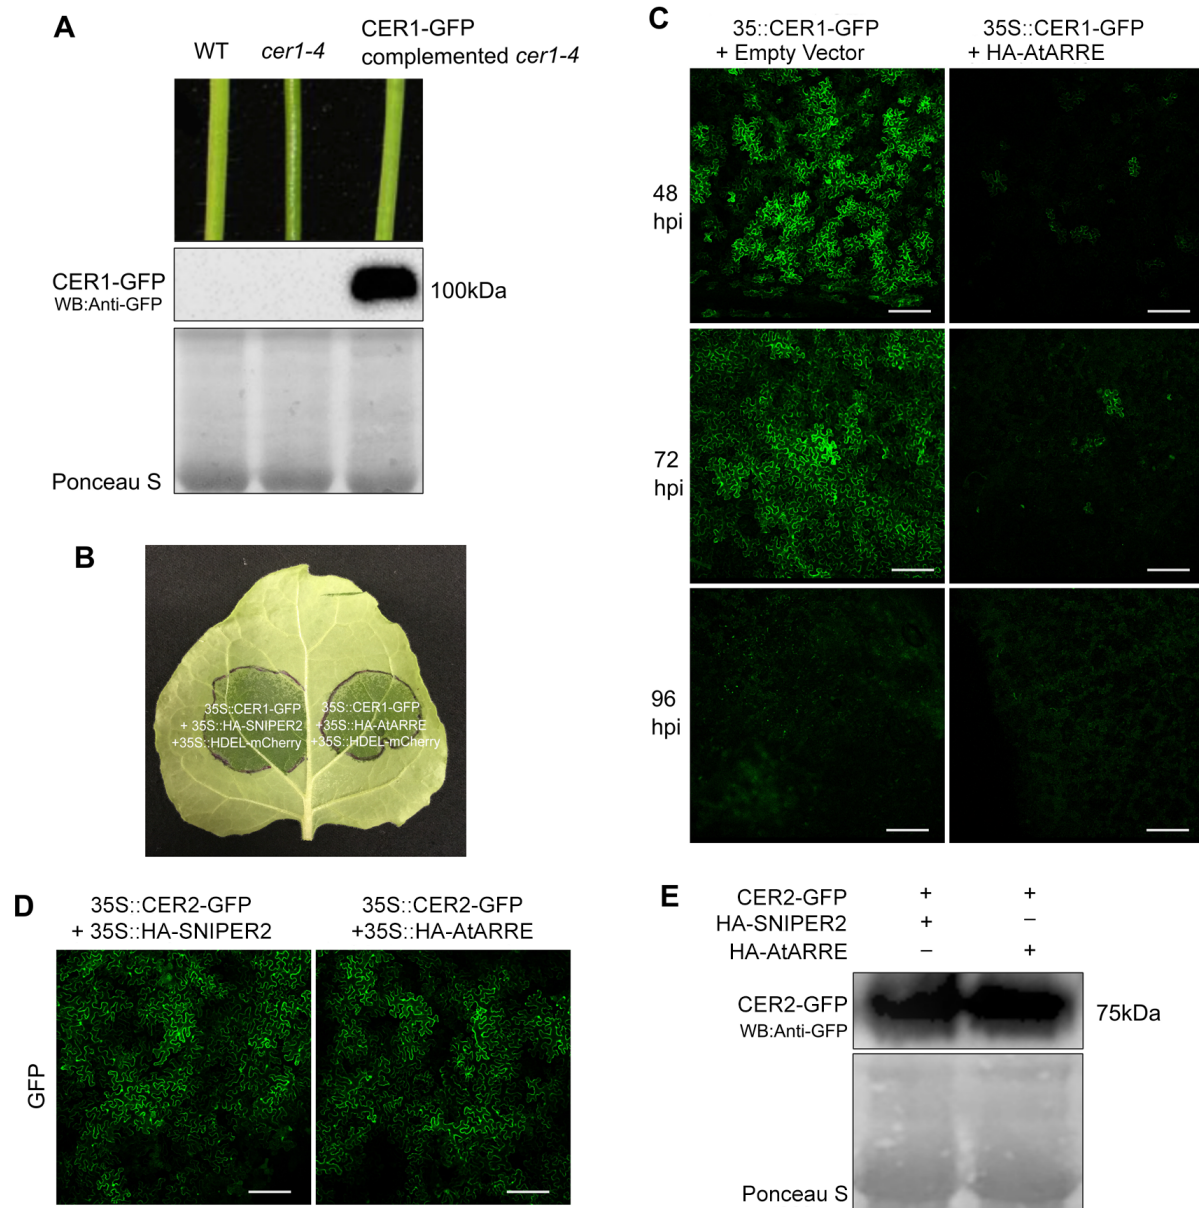

**Supplementary Figure 4.** AtARRE specifically targets CER1 for degradation in *N. benthamiana* leaves.

(A) Stems of the WT, *cer1-4*, and *cer1-4* complemented with *CER6pro:CER1-GFP* transgene (top). CER1-GFP protein level examined by immunoblotting using anti-GFP antibody (middle). Ponceau S staining indicates equal protein loading (bottom). (B) An infiltrated *N. benthamiana* leaf showing the combination of constructs used for co-infiltration. (C) Leaf samples were collected at the indicated time after infiltration and the GFP fluorescence for each sample was examined by confocal microscopy. hpi, hours post infiltration. *35Spro:CER1-GFP* was co-expressed with a *35Spro:HA* empty vector (left panels) or *35Spro:HA-AtARRE* (right panels) (D) *35Spro:CER2-GFP* was co-expressed with *35Spro:HA-SNIPER2* (left) or *35S:HA-AtARRE* (right) and GFP fluorescence was examined by confocal microscopy. Scale bars = 100µm. (E) CER2-GFP protein levels from the protein extracts derived from D were determined by immunoblotting using anti-GFP antibody. Ponceau S staining indicates equal protein loading.



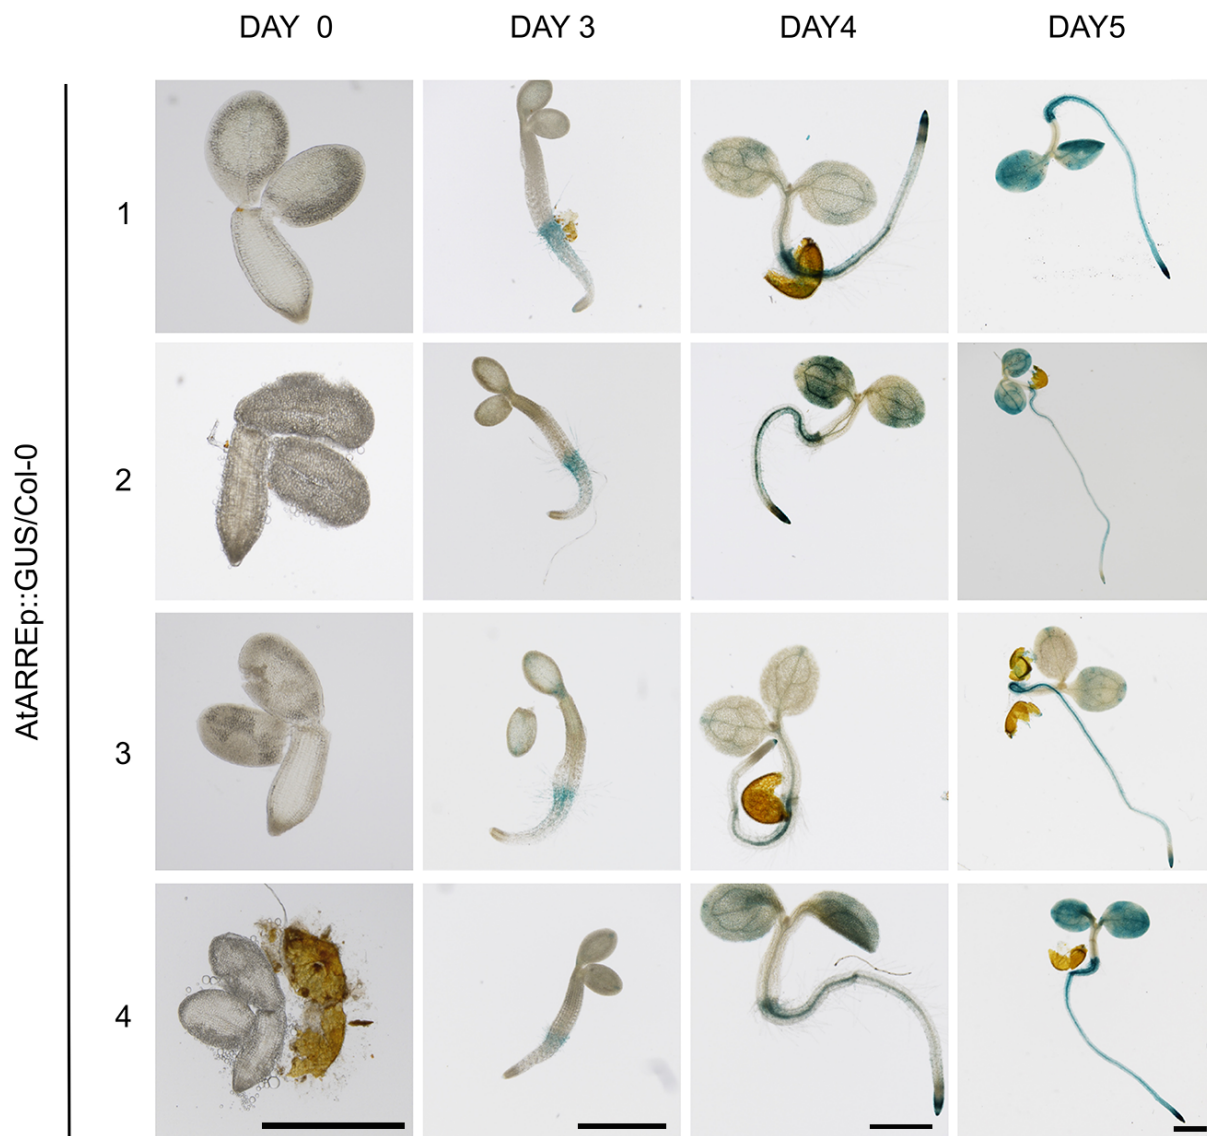

**Supplementary Figure 5.** Cell-type specific expression of the *AtARRE* gene determined by GUS activity assays in transgenic lines expressing *AtARREpro:GUS* construct.

Tissue samples from ten independent transgenic lines were examined for GUS activity, with four of these lines analyzed in detail. Seedlings of four *AtARREpro:GUS* transgenic lines were harvested on the day indicated and stained in GUS staining solution. Columns indicate days after imbibition, with day 0 representing embryos from dry seed. Scale bar = 1mm.

**Supplementary Table 1.** Primers used in this study.

| Primer                                                              | Sequences (5'-3')                                            |
|---------------------------------------------------------------------|--------------------------------------------------------------|
| <b>Primers used for genotyping T-DNA lines of mutants</b>           |                                                              |
| atarre-1 LP                                                         | CTGACTCTGGACGGCACTTAG                                        |
| atarre-1 RP                                                         | GTACAGGGGAAAGGTGAGGAGG                                       |
| atarre-2 LP                                                         | AAGGCATCCAATTCCAGACTC                                        |
| atarre-2 RP                                                         | GTACAGGGGAAAGGTGAGGAGG                                       |
| atarre-3 LP                                                         | TGAGAAGTTGGGTGGTGTTC                                         |
| atarre-3 RP                                                         | CAAACCTGAAGGCAGACAGAG                                        |
| <b>Primers used for genotyping transgenic lines of AtARREOX</b>     |                                                              |
| TransAtARREOX_F                                                     | TGTTCCAGACTACGCTGTCG                                         |
| TransAtARREOX_R                                                     | TCCTCTGATGAAACCGCTCT                                         |
| <b>Primers used for RT-PCR &amp; qPCR</b>                           |                                                              |
| ACT1-NF                                                             | CTCAGTACCTTCCAGCAGATGT                                       |
| ACT1-NR                                                             | AAAAACCCGGCTTGAGAAAT                                         |
| ATARRE_RT-PCR_F                                                     | TCTTGCTCTGTCTGCCTTCA                                         |
| ATARRE_RT-PCR_R                                                     | GCACAAGGGACAAGAAGCAT                                         |
| CER1F-RT                                                            | AGTAGATTAGCAGCAGCTGTTG                                       |
| CER1R-RT                                                            | GCTCTTCTCTTGTTGTTTCCTT                                       |
| CER3-qPCR-F                                                         | CTCATCTCCTGTTCCACATCC                                        |
| CER3-qPCR-R                                                         | TCAATGGAACACCAGCTACG                                         |
| <b>Primers used for site-directed mutagenesis of ATARREOX lines</b> |                                                              |
| H197200Y_F                                                          | TATATGTTCTACCTACCATGCATCGAC                                  |
| H197200Y_R                                                          | GGTAGGTAGAACATATAATGGCAGTGCGG                                |
| ATARREmutate_Seq                                                    | AGGCTTGTTTCGTGAGCGTAT                                        |
| <b>Primer used for CER3 transient expression in tobacco leaves</b>  |                                                              |
| CER3cDNA_attbF                                                      | GGGGACAAGTTTGTACAAAAAAGCAGGCTCAATGGTT<br>GCTTTTTTATCAGCTTGG  |
| CER3cDNA_attbR_WSTOP                                                | GGGGACCACTTTGTACAAGAAAGCTGGGTCTCAATTTG<br>TGAGTGAAGAAACAGCA  |
| CER3cDNA_attbR_NoSTOP                                               | GGGGACCACTTTGTACAAGAAAGCTGGGTCATTTGTGA<br>GTGAAGAAACAGCA     |
| <b>Primers used for GUS assay</b>                                   |                                                              |
| LP_attb1_AtARRE                                                     | GGGGACAAGTTTGTACAAAAAAGCAGGCTTAGAGGGA<br>TGATTGAGGTAAGTTTAAG |
| RP1_attb2_AtARRE                                                    | GGGGACCACTTTGTACAAGAAAGCTGGGTATCTGCAA<br>AAGAGATGAAGAGGAGG   |
| RP2_attb2_AtARRE                                                    | GGGGACCACTTTGTACAAGAAAGCTGGGTAAAGATGT<br>CTTCTGCACAAGGGACAA  |
| GUS_Rseq                                                            | CTGTGGAATTGATCAGCGTTGG                                       |

| <b>Primers used for AtARRE and CER1 expression in bacteria</b> |                              |
|----------------------------------------------------------------|------------------------------|
| ATARRETMdel_F_EcoRI_28b                                        | GACTGAATTCGAGGCTTGTTTCGTGAGC |
| ATARRETMdel_R_SalI                                             | CTAGTCGACAAGATGTCTTCTGCACAAG |
| T7terminator_R_Seq                                             | CTCAAGACCCGTTTAGAGGC         |
| ATARRETMdel_BamHI                                              | GAAGGATCCAGGCTTGTTTCGTGAG    |
| ATARRETMdel_StuI                                               | GTCAGGCCTAAGATGTCTTCTGCACAAG |
| CER1TMdel_EcoRI_F                                              | GACTTGAATTCCTCTTTGTCGCTGAG   |
